# Supplementary material for: Dual-responsive benzylidene indanone crystals: mechanical flexibility coupled with reversible acidochromism
Source: Royal Society of Chemistry journal article supplement (doi:10.1039/d5ce00958h), 2025-12-08
Supplement: d5ce00958h1.pdf [file d5ce00958h1.pdf]

## **Electronic Supporting Information**

### **Dual-Responsive Benzylidene Indanone Crystals: Mechanical Flexibility Coupled with Reversible Acidochromism**

*Riyaaz Ahamed,<sup>a</sup> Aritra Bhowmik,<sup>b,c</sup> Manish Kumar Mishra<sup>\*,b,c</sup> and Soumyajit Ghosh<sup>\*,a</sup>*

<sup>a</sup>Department of Chemistry, SRM Institute of Science and Technology, Kattankulathur 603 203, Tamil Nadu, India.

<sup>b</sup>Physical and Materials Chemistry Division, CSIR-National Chemical Laboratory, Pune 411008, India

<sup>c</sup>Academy of Scientific and Innovative Research (AcSIR), Ghaziabad- 201002, India

---

\* To whom correspondence should be addressed, Email:

[soumyajitghosh89@gmail.com](mailto:soumyajitghosh89@gmail.com) (S.G.)

[mishra\\_mani07@yahoo.in](mailto:mishra_mani07@yahoo.in), and [mk.mishra.ncl@csir.res.in](mailto:mk.mishra.ncl@csir.res.in) (M.K.M)

| <b>Table of Contents</b>                              | <b>Page No</b> |
|-------------------------------------------------------|----------------|
| S1. Synthesis Scheme                                  | S3             |
| S2. Recrystallisation Table                           | S4             |
| S3. Nuclear Magnetic Resonance (NMR) Analysis         | S5 – S6        |
| S4. Differential Scanning Calorimetry (DSC) Analysis  | S7             |
| S5. Crystallographic Information Table                | S8             |
| S6. Face Indexing Images                              | S9             |
| S7. Stepwise Bending Images of Crystal <b>1</b>       | S9             |
| S8. Elastic Strain Calculation                        | S10            |
| S9. Solution State Absorption and Emission Studies    | S11            |
| S10. FTIR Spectra for Acidochromism                   | S12 – S13      |
| S11. After Acid Fumigation Elastic Strain Calculation | S14            |
| S12. Overall Elastic Strain calculation Table         | S15            |
| S13. References                                       | S15            |

## S1. Synthesis Scheme

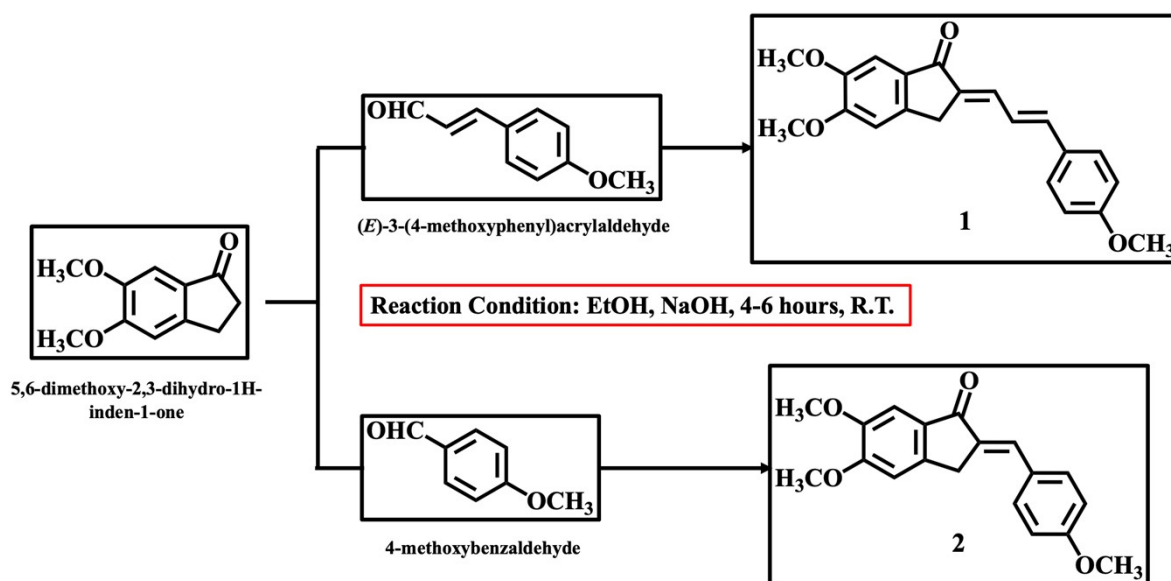

Fig. S1. Synthesis route of compound 1 and compound 2

Compounds 1 and 2 were synthesized following a previously reported procedure.<sup>1</sup> Specifically, 4,5-dimethoxy-1-indanone (1 mmol) was dissolved in a 100 ml round-bottom flask containing 15 ml of ethanol and a sodium hydroxide solution. Subsequently, trans-4-methoxycinnamaldehyde (1 mmol) and 4-methoxybenzaldehyde (1 mmol) were added to the resulting solution, respectively. The mixture was stirred for 4-6 hours under ambient conditions, leading to the formation of precipitates of compounds 1 and 2 (Scheme S1) with satisfactory yields (Compound 1: ~85% and Compound 2: ~90%).

## S2. Recrystallisation Table

**Table S1.** Results from the recrystallisation of Compounds **1** and **2** from one solvent or mixture of solvents.

| S. No. | Solvents                            | Compound 1   | Compound 2   |
|--------|-------------------------------------|--------------|--------------|
| 1.     | Methanol                            | Powder       | Fine Needles |
| 2.     | Chloroform                          | Powder       | Powder       |
| 3.     | Acetone                             | Powder       | Fine Needles |
| 4.     | Dichloromethane + Methanol<br>(1:1) | Powder       | Powder       |
| 5.     | Methanol + Chloroform (1:1)         | Fine Needles | Fine Needles |
| 6.     | Acetonitrile                        | Powder       | Powder       |
| 7.     | Acetone + Chloroform                | Powder       | Powder       |
| 8.     | Acetone + Methanol (1:1)            | Powder       | Fine Needles |
| 9.     | Chloroform + Acetonitrile (1:1)     | Fine Needles | Powder       |

### S3. Nuclear Magnetic Resonance (NMR) Analysis.

$^1\text{H}$  NMR spectra of both Crystal 1 and Crystal 2 were taken in  $\text{CDCl}_3$  solvent.  $^1\text{H}$  NMR spectra were collected under standard conditions. Chemical shifts ( $\delta$ ) were reported in parts per million (ppm) and referenced to the residual solvent peak at 7.26 ppm for the  $\text{CDCl}_3$  solvent peak and 1.60 ppm for the  $\text{CDCl}_3$  water peak.

**Crystal 1:**  $^1\text{H}$  NMR (400 MHz,  $\text{CDCl}_3$ ),  $\delta$  3.74 (s, 2H, methyl-H),  $\delta$  3.84 (s, 3H, methoxy-H),  $\delta$  3.94 (s, 3H, methoxy-H),  $\delta$  3.99 (s, 3H, methoxy-H),  $\delta$  7.02 – 6.82 (m, 5H, aromatic-H and vinylic-H),  $\delta$  7.39 – 7.24 (m, 2H, aromatic-H and vinylic-H),  $\delta$  7.47 (d,  $J = 8.7$  Hz, 2H, aromatic-H). (Fig. S2).

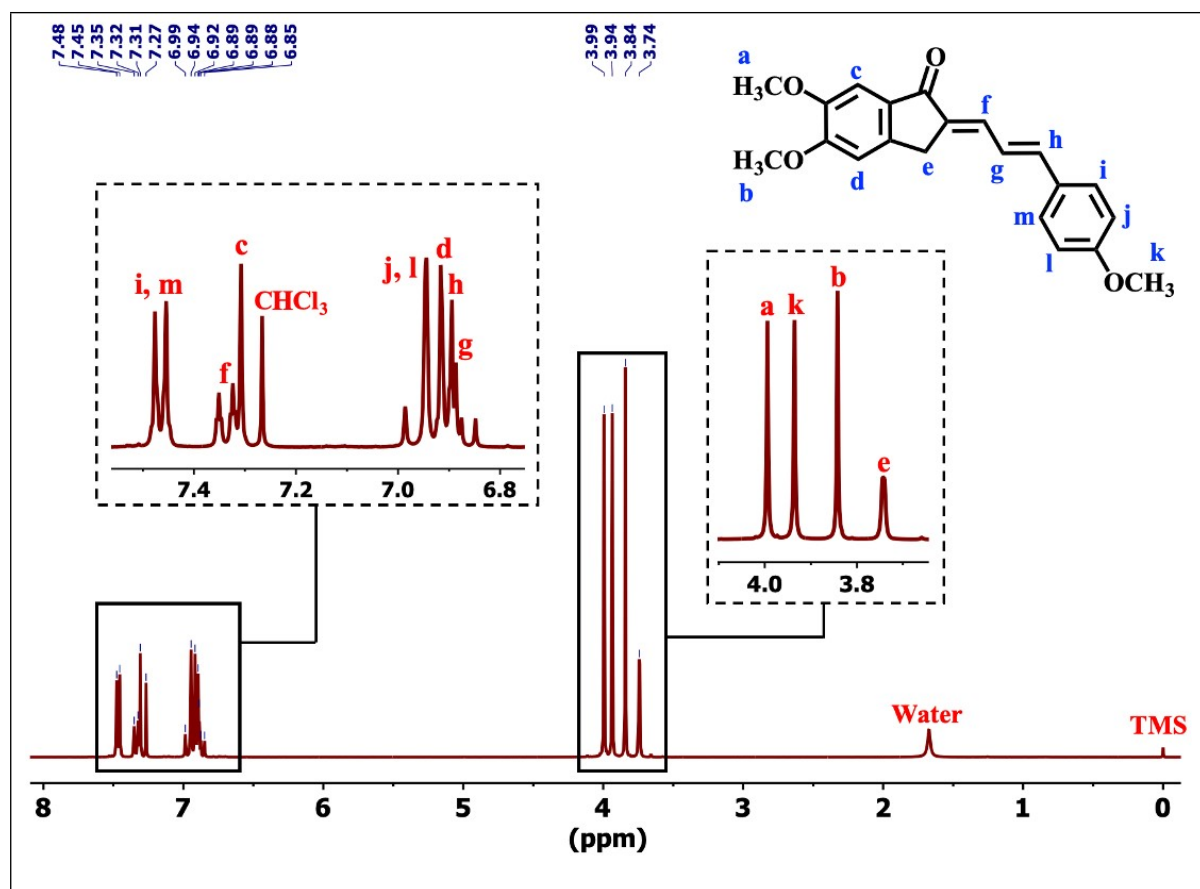

Fig. S2.  $^1\text{H}$  NMR spectrum of Crystal 1 (solvent:  $\text{CDCl}_3$ , peak at 7.26 ppm).

**Crystal 2:**  $^1\text{H}$  NMR (500 MHz,  $\text{CDCl}_3$ ),  $\delta$  3.89 (s, 3H, methoxy-H),  $\delta$  3.95 (s, 2H, methyl-H),  $\delta$  3.97 (s, 3H, methoxy-H),  $\delta$  4.02 (s, 3H, methoxy-H),  $\delta$  6.99 (d,  $J = 8.4$  Hz, 3H, aromatic-H),  $\delta$  7.36 (s, 1H, aromatic-H),  $\delta$  7.58 (s, 1H, vinylic-H),  $\delta$  7.64 (d,  $J = 8.7$  Hz, 2H, aromatic-H). (Fig. S3).

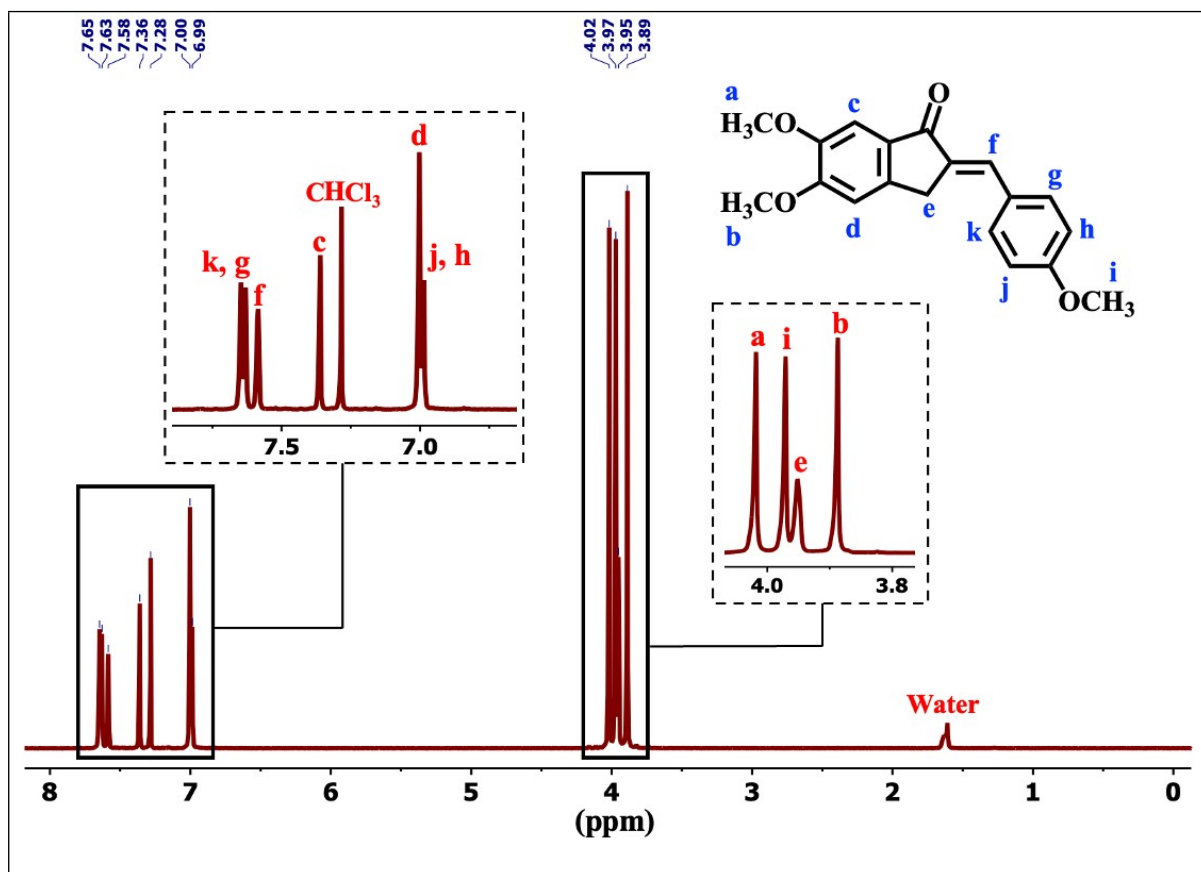

**Fig. S3.**  $^1\text{H}$  NMR spectrum of crystal 2 (solvent:  $\text{CDCl}_3$ , peak at 7.26 ppm).

#### S4. Differential Scanning Calorimetry (DSC) Analysis.

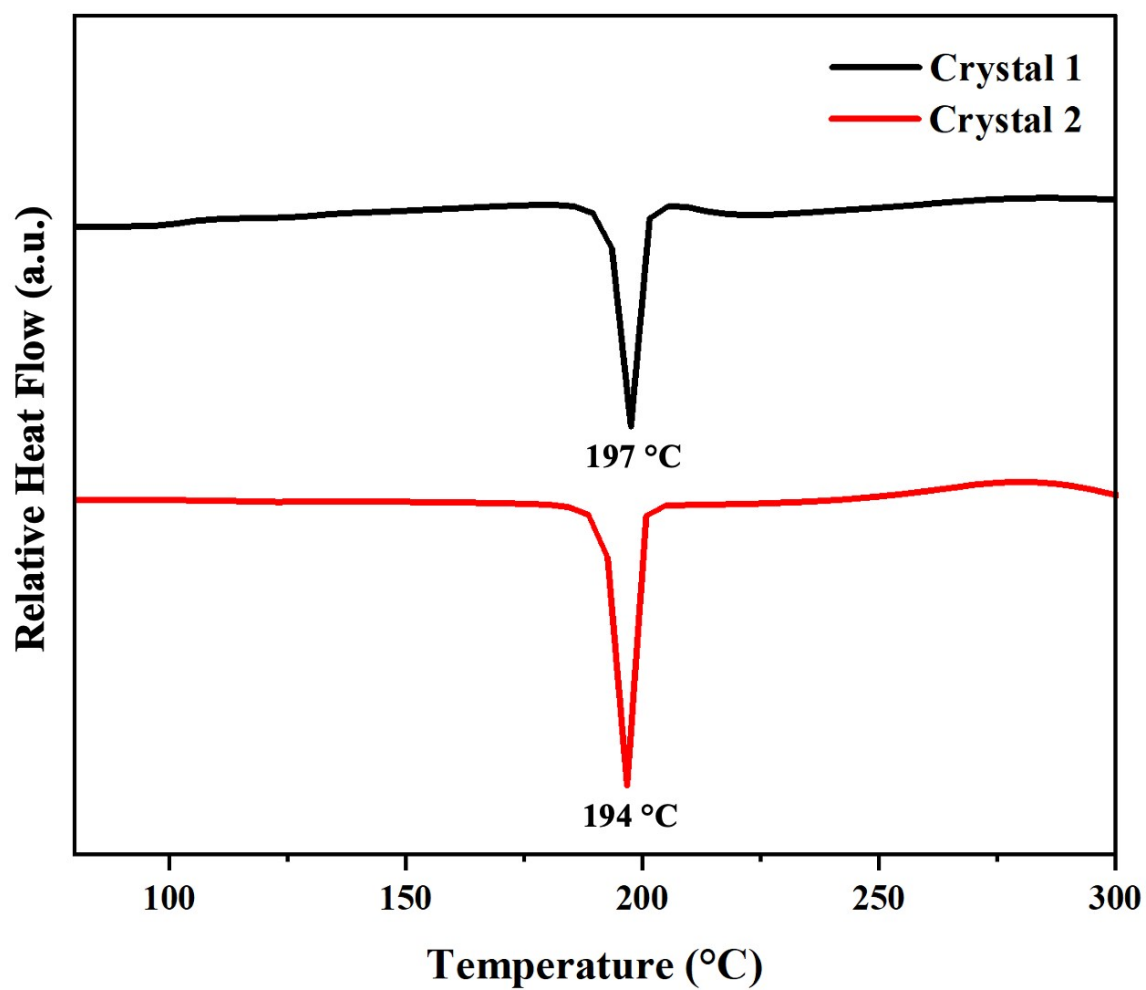

Fig. S4. Differential Scanning Calorimetry (DSC) overlay diagram of crystals 1 and 2.

## S5. Crystallographic Information Table.

**Table S2:** Crystallographic information table.

| Compound                        | Crystal 1                                      | Crystal 2                                      |
|---------------------------------|------------------------------------------------|------------------------------------------------|
| Formula                         | C <sub>21</sub> H <sub>20</sub> O <sub>4</sub> | C <sub>19</sub> H <sub>17</sub> O <sub>4</sub> |
| Molecular Weight                | 336.37                                         | 309.32                                         |
| T/K                             | 298                                            | 298                                            |
| Crystal System                  | Monoclinic                                     | Monoclinic                                     |
| Space Group                     | <i>P</i> 2 <sub>1</sub> / <i>c</i>             | <i>P</i> 2 <sub>1</sub> / <i>c</i>             |
| <i>a</i> /Å                     | 4.6803(9)                                      | 4.8459(8)                                      |
| <i>b</i> /Å                     | 40.269(7)                                      | 35.354(6)                                      |
| <i>c</i> /Å                     | 9.2487(17)                                     | 9.1074(15)                                     |
| $\alpha$ /°                     | 90                                             | 90                                             |
| $\beta$ /°                      | 96.433(5)                                      | 97.576(5)                                      |
| $\gamma$ /°                     | 90                                             | 90                                             |
| Volume/Å <sup>3</sup>           | 1732.1(6)                                      | 1546.7(4)                                      |
| <i>Z</i>                        | 4                                              | 4                                              |
| $\rho$ , Mg.cm <sup>-3</sup>    | 1.290                                          | 1.328                                          |
| $\mu$ /mm <sup>-1</sup>         | 0.089                                          | 0.093                                          |
| Reflections Collected           | 32841                                          | 33608                                          |
| Independent Reflections         | 3070                                           | 2655                                           |
| R <sub>int</sub>                | 0.1026                                         | 0.1492                                         |
| GOF                             | 1.135                                          | 1.061                                          |
| Final R[ <i>I</i> >2 $\sigma$ ] | 0.0962                                         | 0.0595                                         |
| R <sub>1</sub>                  | 0.2232                                         | 0.1380                                         |
| wR <sub>2</sub>                 | 0.2463                                         | 0.2108                                         |
| CCDC Number                     | 2492718                                        | 2492719                                        |



## S6. Face Indexing Image.

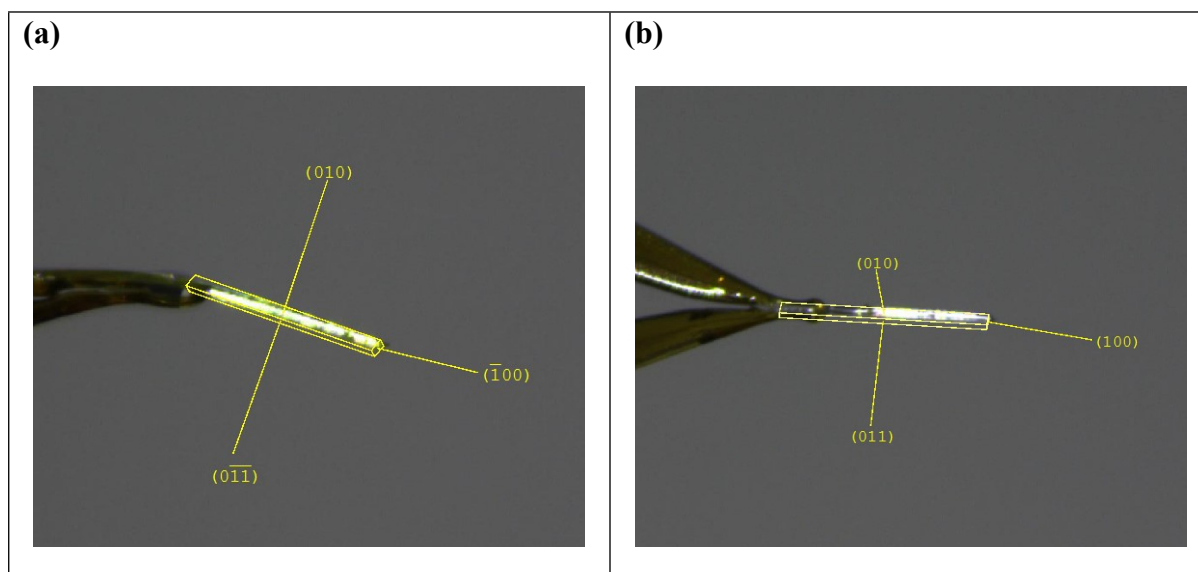

**Fig. S5:** Face indexing image of (a) Crystal 1, (b) Crystal 2.

## S7. Stepwise Bending Images of Crystal 1.

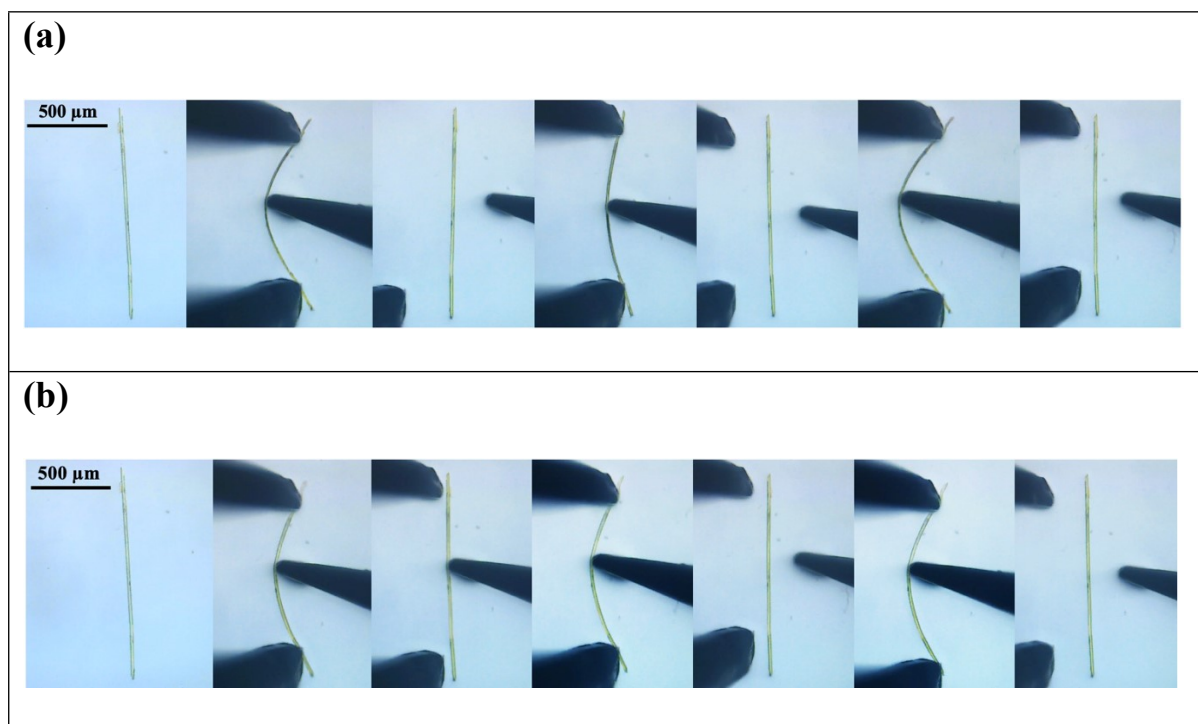

**Fig. S6:** Stepwise elastic bending images of crystal 1 (a) (010) face (b) (011) face.

## S8. Elastic Strain Calculation.

|                                                                                                      |                                                                                                                                                                                                                                                                                                                                                                                                                                                                                                                            |
|------------------------------------------------------------------------------------------------------|----------------------------------------------------------------------------------------------------------------------------------------------------------------------------------------------------------------------------------------------------------------------------------------------------------------------------------------------------------------------------------------------------------------------------------------------------------------------------------------------------------------------------|
| <p><b>(a)</b></p> 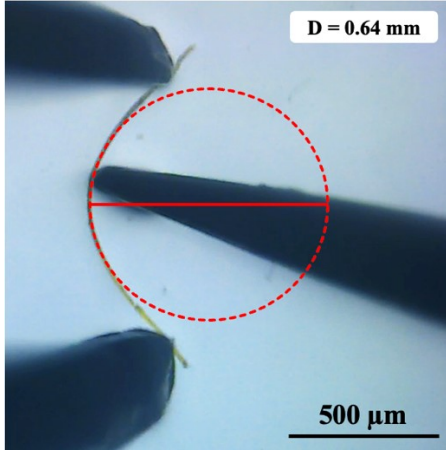  | <p><math>R = d/2 = 0.32 \text{ mm}</math>, (where <math>d</math> is the diameter of the semicircle formed and so the radius is <math>d/2</math>)</p> <p>For a beam with a thickness, <math>t</math>,</p> $\epsilon (\%) = \frac{t}{2R} \times 100 = \frac{0.02}{0.64} \times 100 = \mathbf{3.1 \%}$ <p>where '<math>\epsilon (\%)</math>' is the elastic strain of the crystal, '<math>t</math>' is the thickness of the crystal, and '<math>R</math>' is the radius of the semi-circle formed by bending the crystal.</p> |
| <p><b>(b)</b></p>  | <p><math>R = d/2 = 0.34 \text{ mm}</math>, (where <math>d</math> is the diameter of the semicircle formed and so the radius is <math>d/2</math>)</p> <p>For a beam with a thickness, <math>t</math>,</p> $\epsilon (\%) = \frac{t}{2R} \times 100 = \frac{0.02}{0.68} \times 100 = \mathbf{2.9 \%}$ <p>where '<math>\epsilon (\%)</math>' is the elastic strain of the crystal, '<math>t</math>' is the thickness of the crystal, and '<math>R</math>' is the radius of the semi-circle formed by bending the crystal.</p> |

**Fig. S7:** Elastic strain calculation of Crystal 1 from (010) face (a) and (011) face (b).

## S9. Solution State Absorption and Emission Studies.

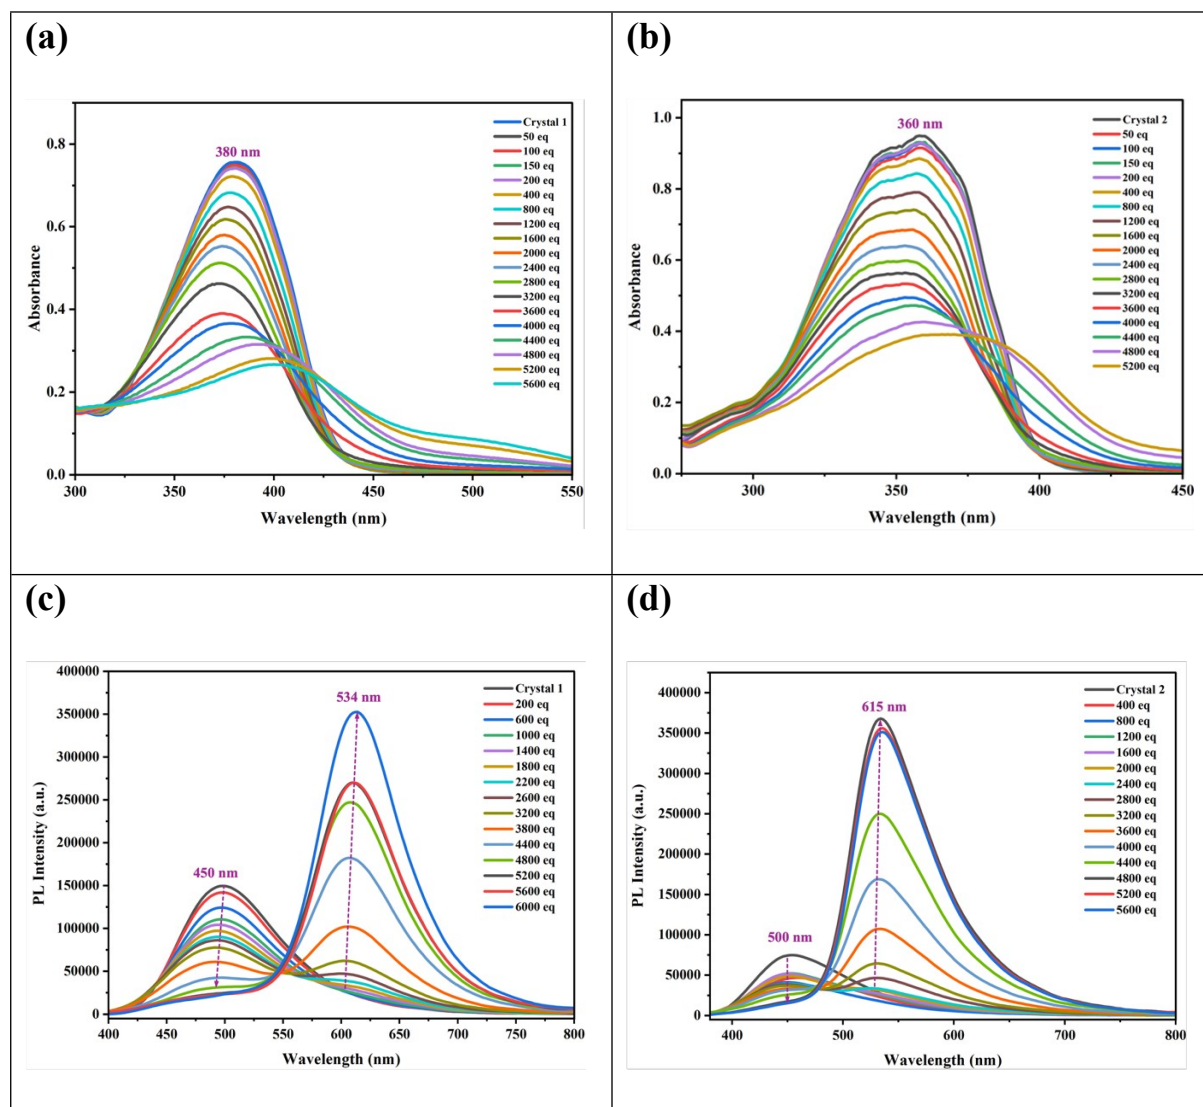

**Fig. S8.** (a) and (b) Solution state absorption, and (c) and (d) emission spectra ( $6 \times 10^{-6}$  M) of crystals **1** and **2** as a function of TFA concentration in DMSO.

## S10. FTIR Spectra for Acidochromism.

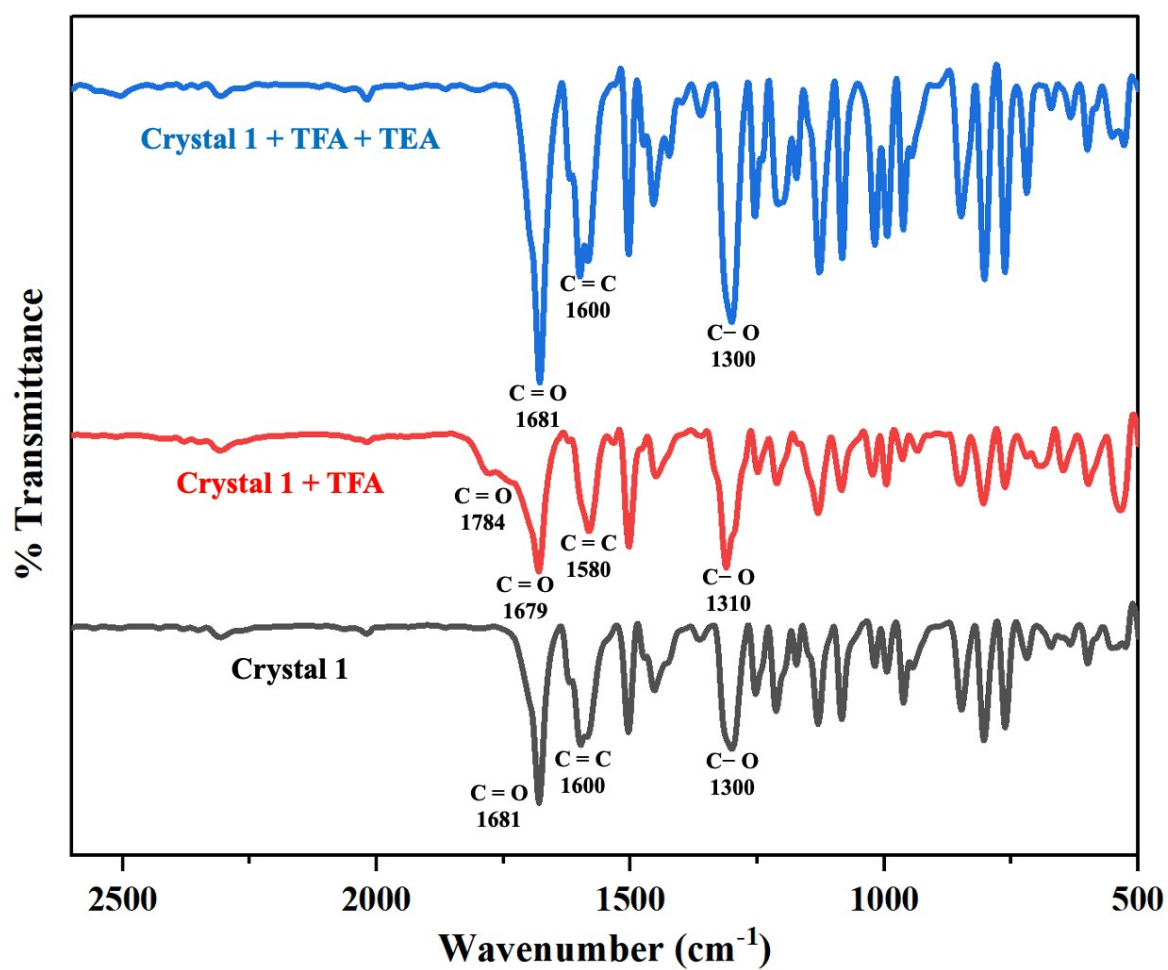

**Fig. S9:** FTIR overlay spectra of crystals 1 depicting spectra of pristine sample, treated with TFA and TEA.

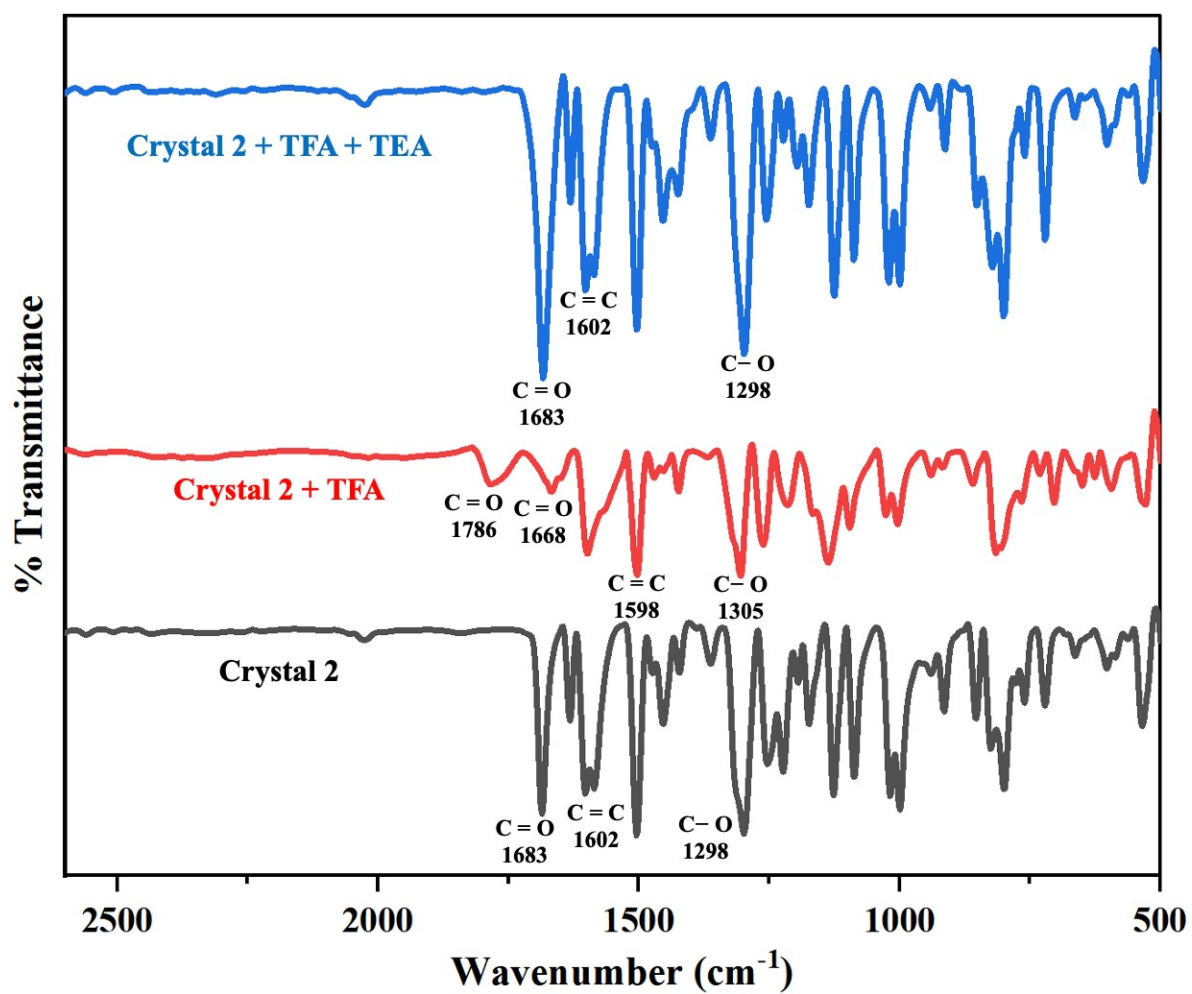

**Fig. S10:** FTIR overlay spectra of crystals 2 depicting spectra of pristine sample, treated with TFA and TEA.

### S11. After Acid Fumigation Elastic Strain calculation.

|                                                                                               |                                                                                                                                                                                                                                                                                                                                                                                                                                                                                                                                   |
|-----------------------------------------------------------------------------------------------|-----------------------------------------------------------------------------------------------------------------------------------------------------------------------------------------------------------------------------------------------------------------------------------------------------------------------------------------------------------------------------------------------------------------------------------------------------------------------------------------------------------------------------------|
| <p>(a)</p> 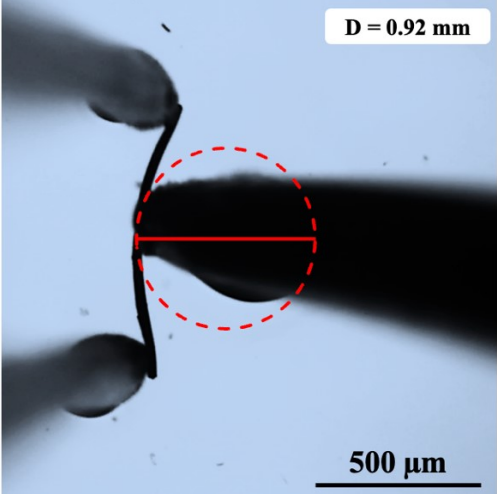  | <p><math>R = d/2 = 0.46 \text{ mm}</math>, (where <math>d</math> is the diameter of the semicircle formed and so the radius is <math>d/2</math>)</p> <p>For a beam with a thickness, <math>t</math>,</p> $\varepsilon (\%) = \frac{t}{2R} \times 100 = \frac{0.016}{0.92} \times 100 = \mathbf{1.7 \%}$ <p>where '<math>\varepsilon (\%)</math>' is the elastic strain of the crystal, '<math>t</math>' is the thickness of the crystal, and '<math>R</math>' is the radius of the semi-circle formed by bending the crystal.</p> |
| <p>(b)</p>  | <p><math>R = d/2 = 0.26 \text{ mm}</math>, (where <math>d</math> is the diameter of the semicircle formed and so the radius is <math>d/2</math>)</p> <p>For a beam with a thickness, <math>t</math>,</p> $\varepsilon (\%) = \frac{t}{2R} \times 100 = \frac{0.012}{0.52} \times 100 = \mathbf{2.3 \%}$ <p>where '<math>\varepsilon (\%)</math>' is the elastic strain of the crystal, '<math>t</math>' is the thickness of the crystal, and '<math>R</math>' is the radius of the semi-circle formed by bending the crystal.</p> |

**Fig. S11.** Elastic strain calculation of Crystal **1** + TFA **(a)** (011) face **(b)** (010) face.

## S12. Overall Elastic Strain Calculation Table.

**Table S3:** Overall Elastic Strain Calculation Table

| S. No | Name                   | Elastic Strain Values ' $\epsilon$ (%)' |            |
|-------|------------------------|-----------------------------------------|------------|
|       |                        | (010) face                              | (011) face |
| 1.    | Crystal <b>1</b>       | 3.1                                     | 2.9        |
| 2.    | Crystal <b>1</b> + TFA | 2.3                                     | 1.7        |

## S13. References:

1. R. Ahamed, A. Bhowmik, M. K. Mishra and S. Ghosh, *Cryst. Growth Des.*, 2025, **25**, 4481 – 4493.
